# Supplementary material
Source: Springer Nature journal article supplement (https://www.springermedizin.de/resource/supplementary/12968_2011_2002_MOESM4_ESM.pdf/9581106)

SLA

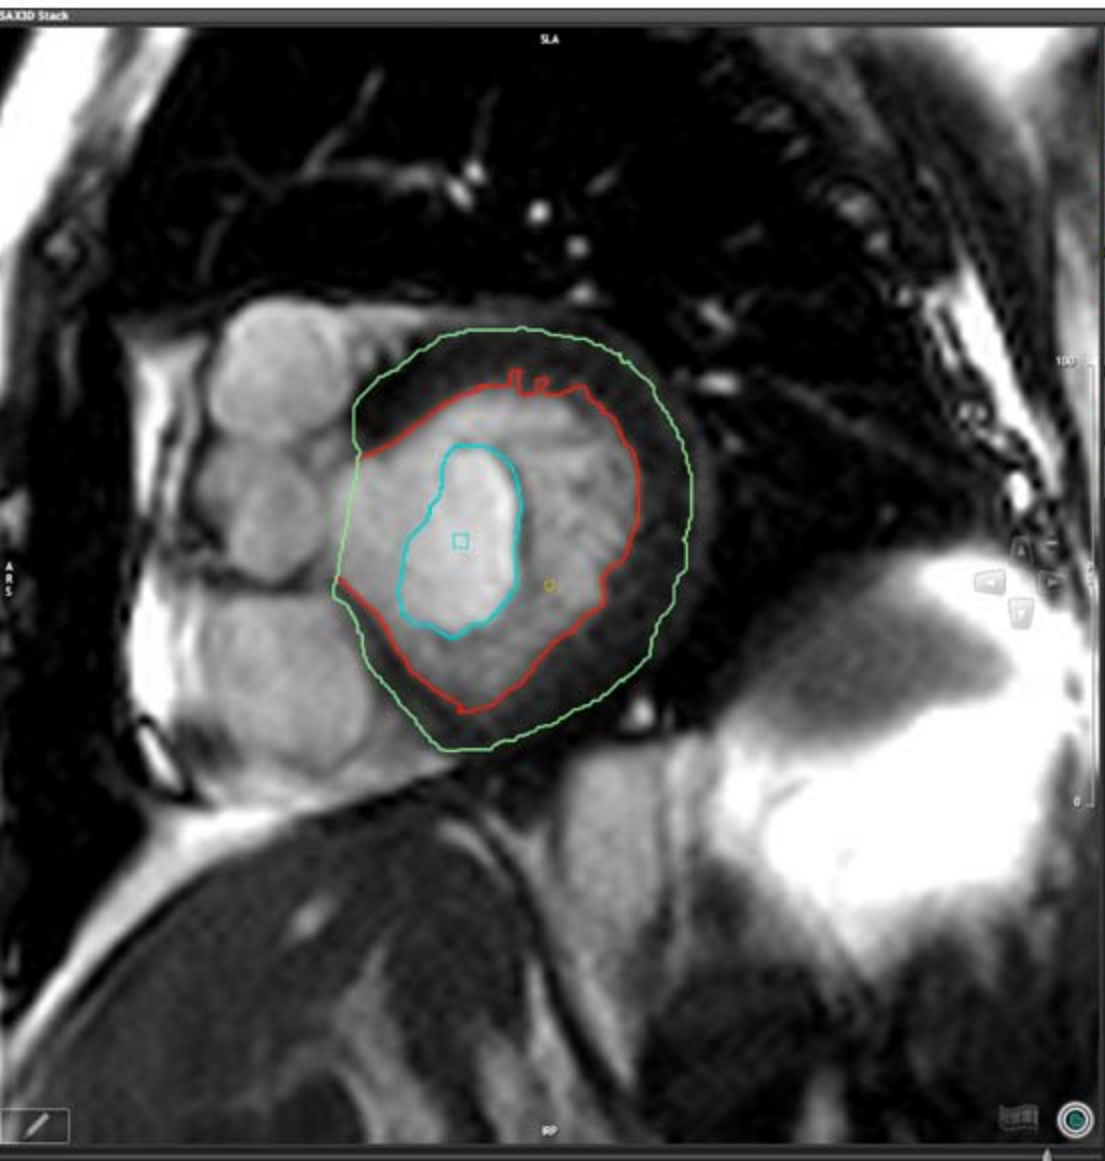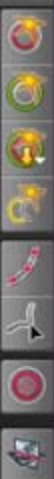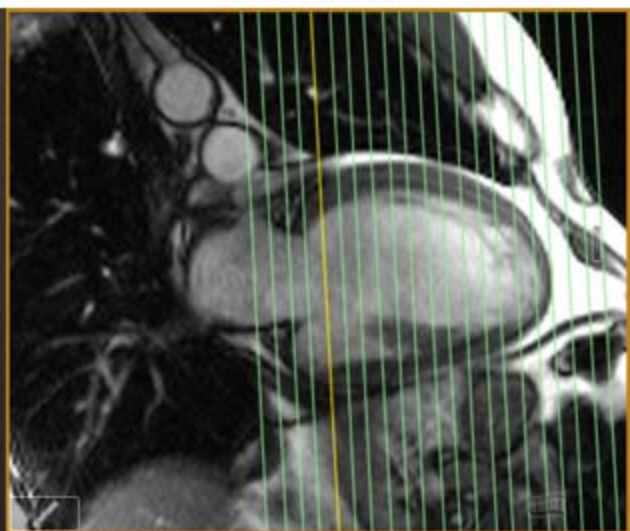

Disable Warning Messages

A row of icons for system settings and warnings. From left to right: a warning icon (triangle with exclamation mark), a graph icon, a yellow star icon, a blue harp icon, and a system settings icon (gear).

Reference

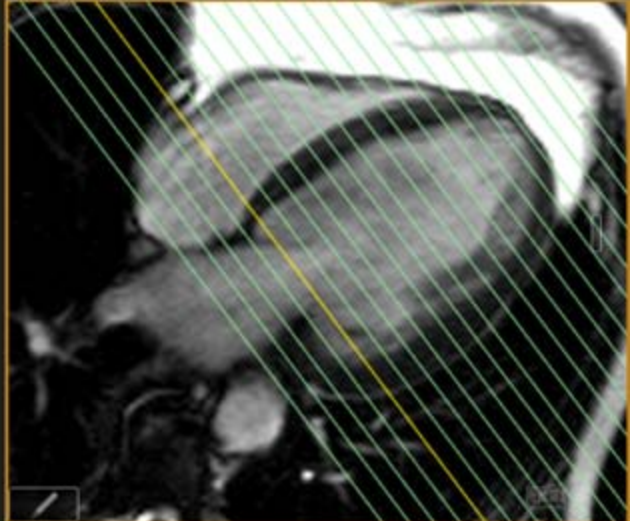

Supplement: MOESM4 [file 9581106]
